# Supplementary material
Source: publisher figshare collection journal article supplement (https://frontiersin.figshare.com/ndownloader/files/12303146)
Supplement: Supplementary file 1 [file 12303146]

Supplementary Material

Targeted methotrexate prodrug conjugated with heptamethine cyanine dye improving chemotherapy and monitoring itself activating by dual-modal imaging

Sanpeng Li‡1,2, Zhihong Sun‡1, Xiaoqing Meng1,2, Guanjun Deng1,2, Jiali Zhang1,2, Kui Zhou3, Wenjun Li1, Lihua Zhou1, Ping Gong1,4* and Lintao Cai1*

1Guangdong Key Laboratory of Nanomedicine, CAS Key Lab for Health Informatics, Shenzhen Engineering Laboratory of Nanomedicine and Nanoformulations, Shenzhen Institutes of Advanced Technology (SIAT), Chinese Academy of Sciences, Shenzhen, China.

2University of Chinese Academy of Sciences, Beijing, China.

3Department of laboratory Medicine, Peking University Shenzhen Hospital, Shenzhen, China.

4State Key Laboratory of Chemo/Biosensing and Chemometrics, Hunan University, Changsha, China.

*** Correspondence:** [lt.cai@siat.ac.cn](mailto:lt.cai@siat.ac.cn), [ping.gong@siat.ac.cn](mailto:ping.gong@siat.ac.cn)

‡ These authors contributed equally to this work.


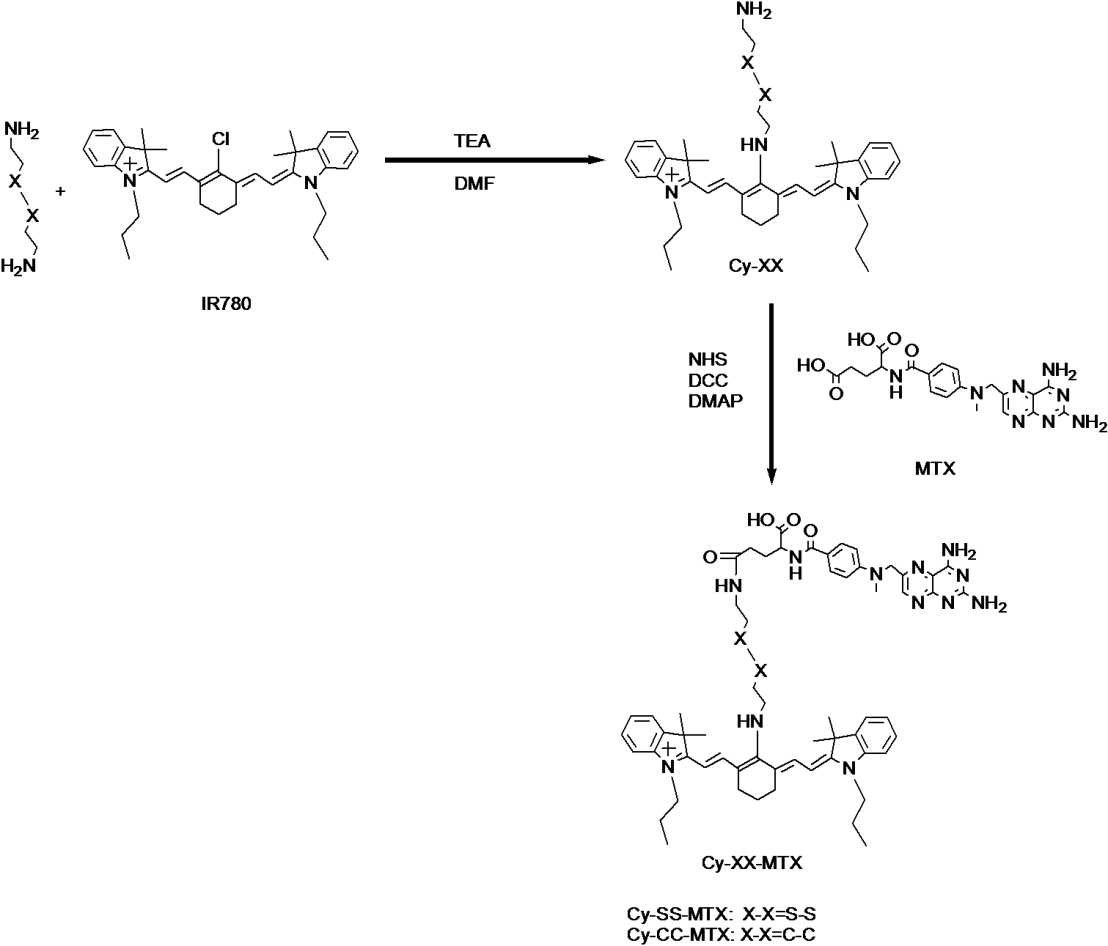


**Supplementary Figure 1:** Synthetic route of Cy-SS-MTX/Cy-CC-MTX

.


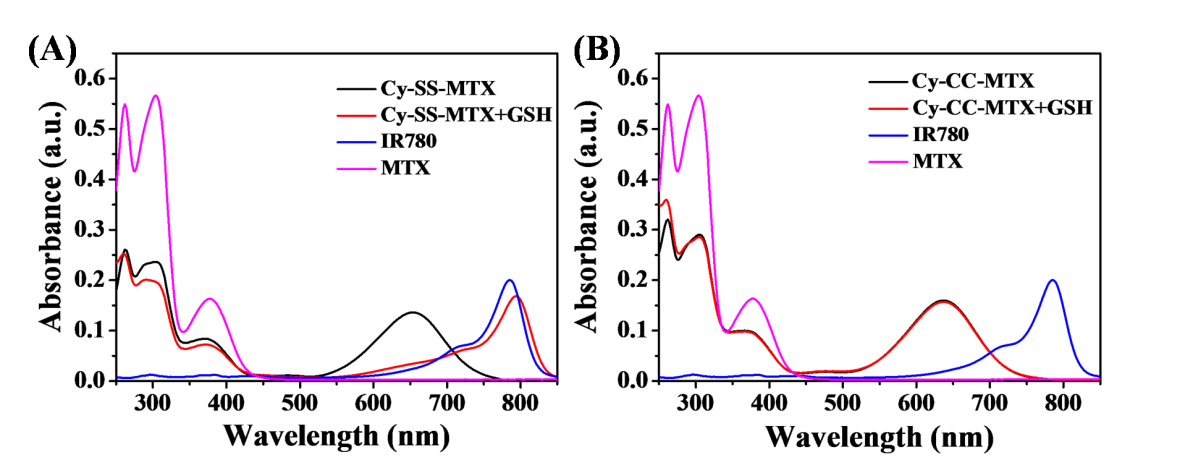


**Supplementary Figure 2:** **(A)** Normalized UV-Vis absorption of Cy-SS-MTX (5 μM) in the DMSO/PBS (V/V=4:6) solution with or without 250 μM GSH. **(B)** Normalized UV-Vis absorption of Cy-CC-MTX (5 μM) in the DMSO/PBS (V/V=4:6) solution with or without 250 μM GSH. All spectrums were measured after incubation for 15 min at 37℃ temperature (Cy: IR780 and MTX: Methotrexate).


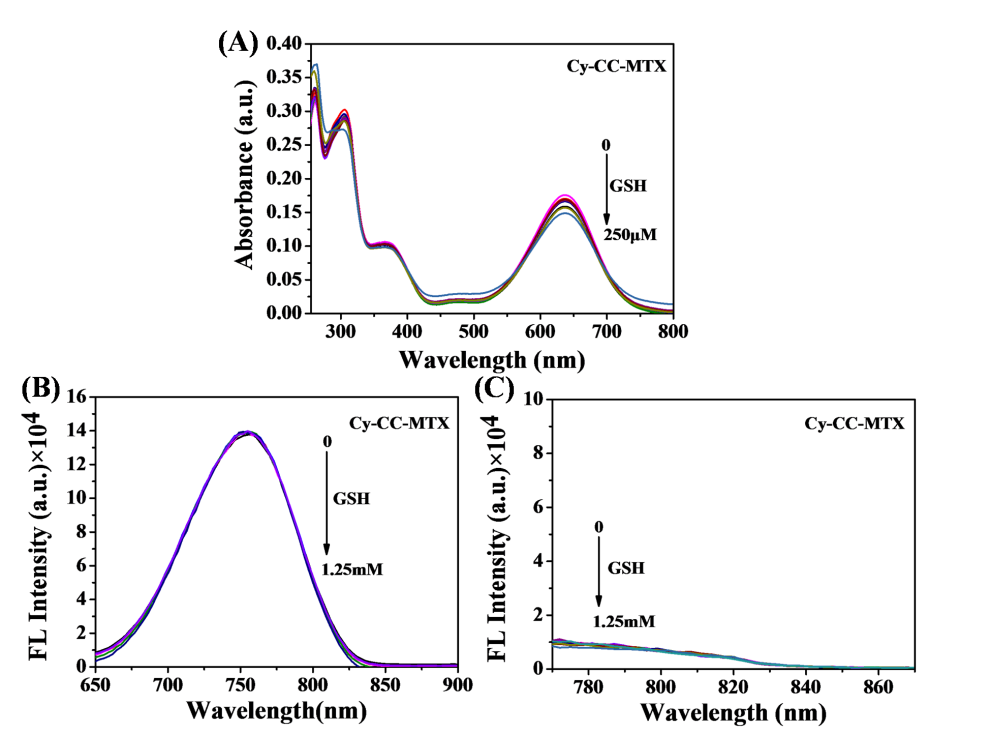


**Supplementary Figure 3: (A)** Normalized UV-Vis absorption of Cy-CC-MTX (5 μM) in the DMSO/PBS (V/V=4:6) solution with various concentration GSH. **(B)** The fluorescence spectra of Cy-CC-MTX excited by 640 nm (5 μM) in the DMSO/PBS (V/V=4:6) solution with various concentration GSH Cy-SS-MTX (5 μM). **(C)** Cy-CC-MTX excited by 745 nm.


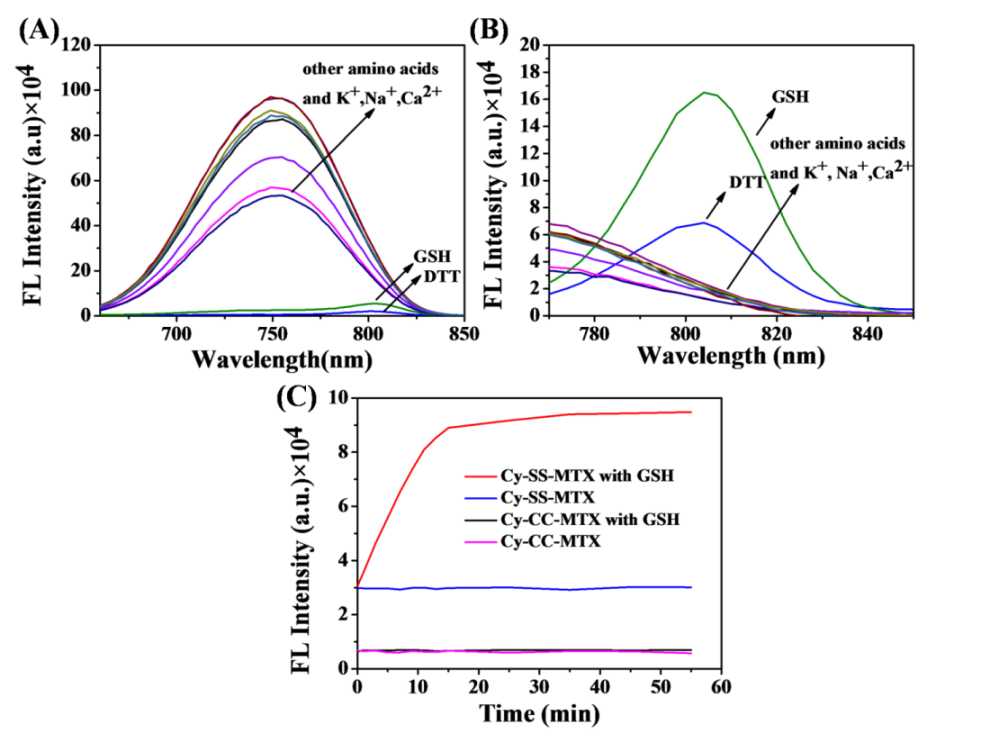


**Supplementary Figure 4:** **(A)** The fluorescence spectra of Cy-SS-MTX (5 μM) excited by 640 nm with thiol-containing structure (750 μM GSH/DTT) or other amino acids (750 μM). **(B)** Cy-SS-MTX (5 μM) excited by 745 nm. **(C)** The time dependence of fluorescence intensity at 808 nm of Cy-SS-MTX/Cy-CC-MTX in the presence of GSH (750 μM).


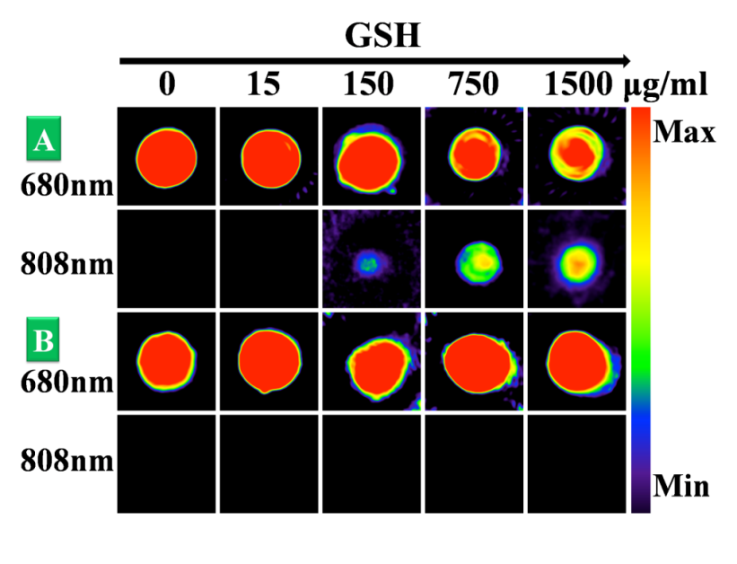


**Supplementary Figure 5:** The photoacoustic imaging of Cy-SS-MTX **(A)**/Cy-CC-MTX **(B)** excited by 680 nm and 808 nm respectively in the presence of various concentration of GSH. The value of concentration of Cy-SS-MTX/Cy-CC-MTX was 15 μg/ml. The samples were tested after exposure to GSH for 1h at 37℃.


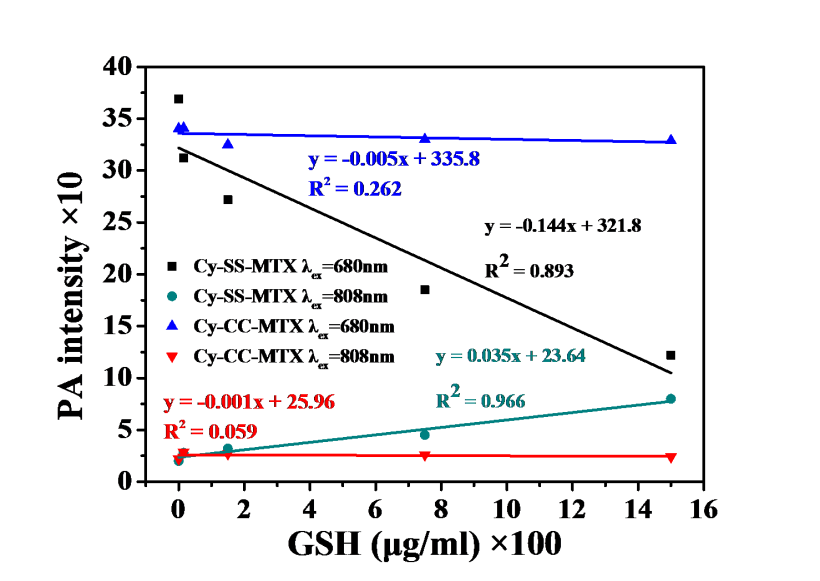


**Supplementary Figure 6:** The PA intensity responses of Cy-SS-MTX/Cy-CC-MTX to GSH according to **Supplemental figure 4**.


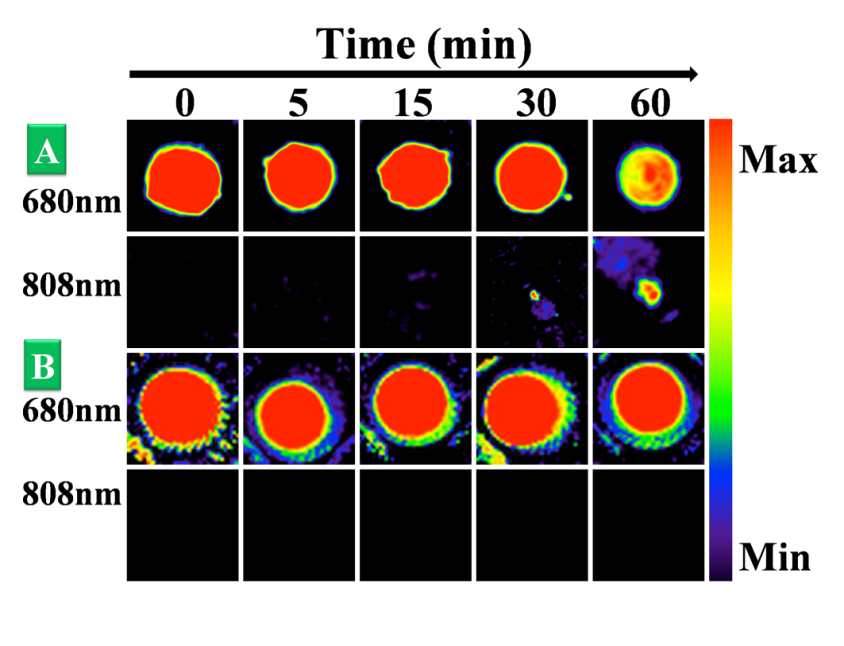


**Supplementary Figure 7**: Time dependence of photoacoustic imaging of Cy-SS-MTX **(A)**/Cy-CC-MTX **(B)** excited by 680 nm and 808 nm respectively in the presence of GSH (1500 μg/ml). The value of concentration of Cy-SS-MTX/Cy-CC-MTX was 15 μg/ml.


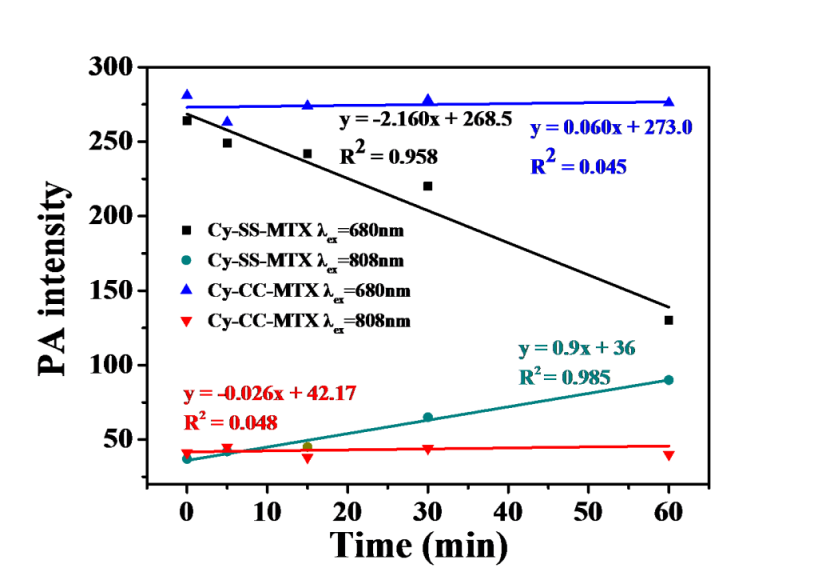


**Supplementary Figure 8:** The PA intensity responses of Cy-SS-MTX/Cy-CC-MTX to time according to Supplemental figure 6.


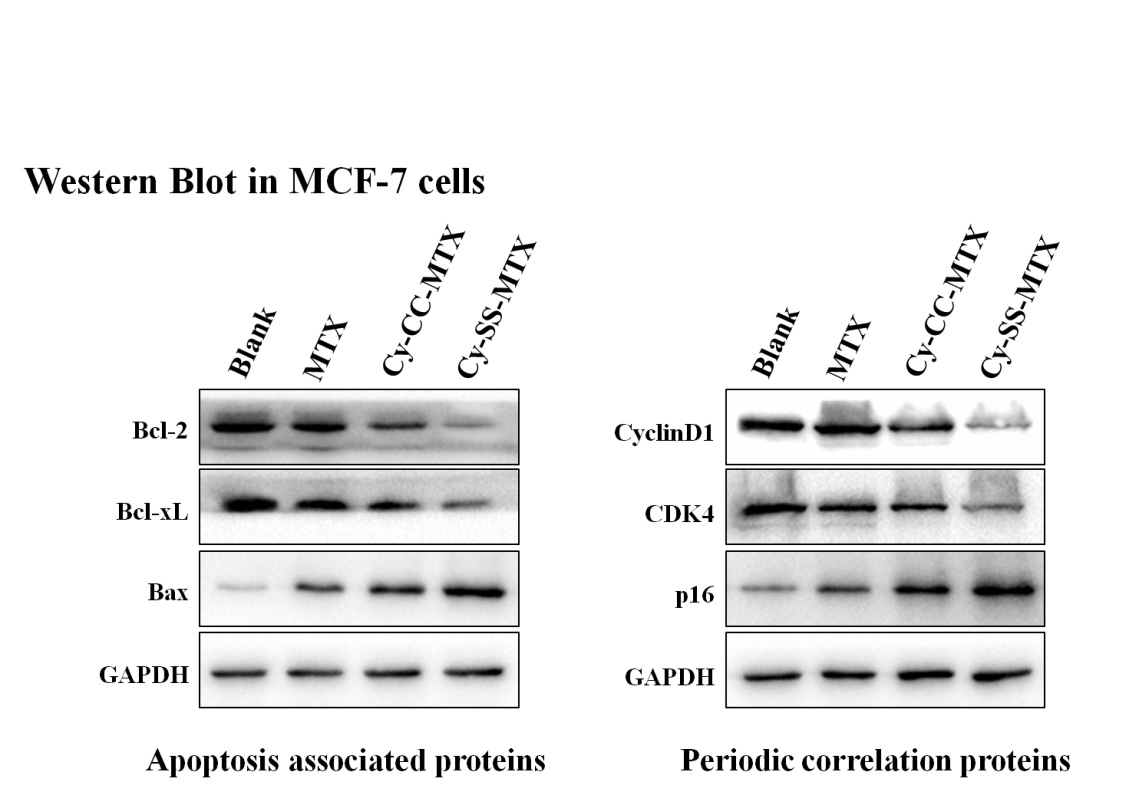


**Supplementary Figure 9:** Western Blot to study the cell cycle arrest and cytotoxic assay induced by Cy-SS-MTX in MCF-7 cells.

**Supplementary Figure 10:** TOF Mass Spectrometer of Cy-SS/Cy-SS-MTX/Cy-CC/Cy-CC-MTX.


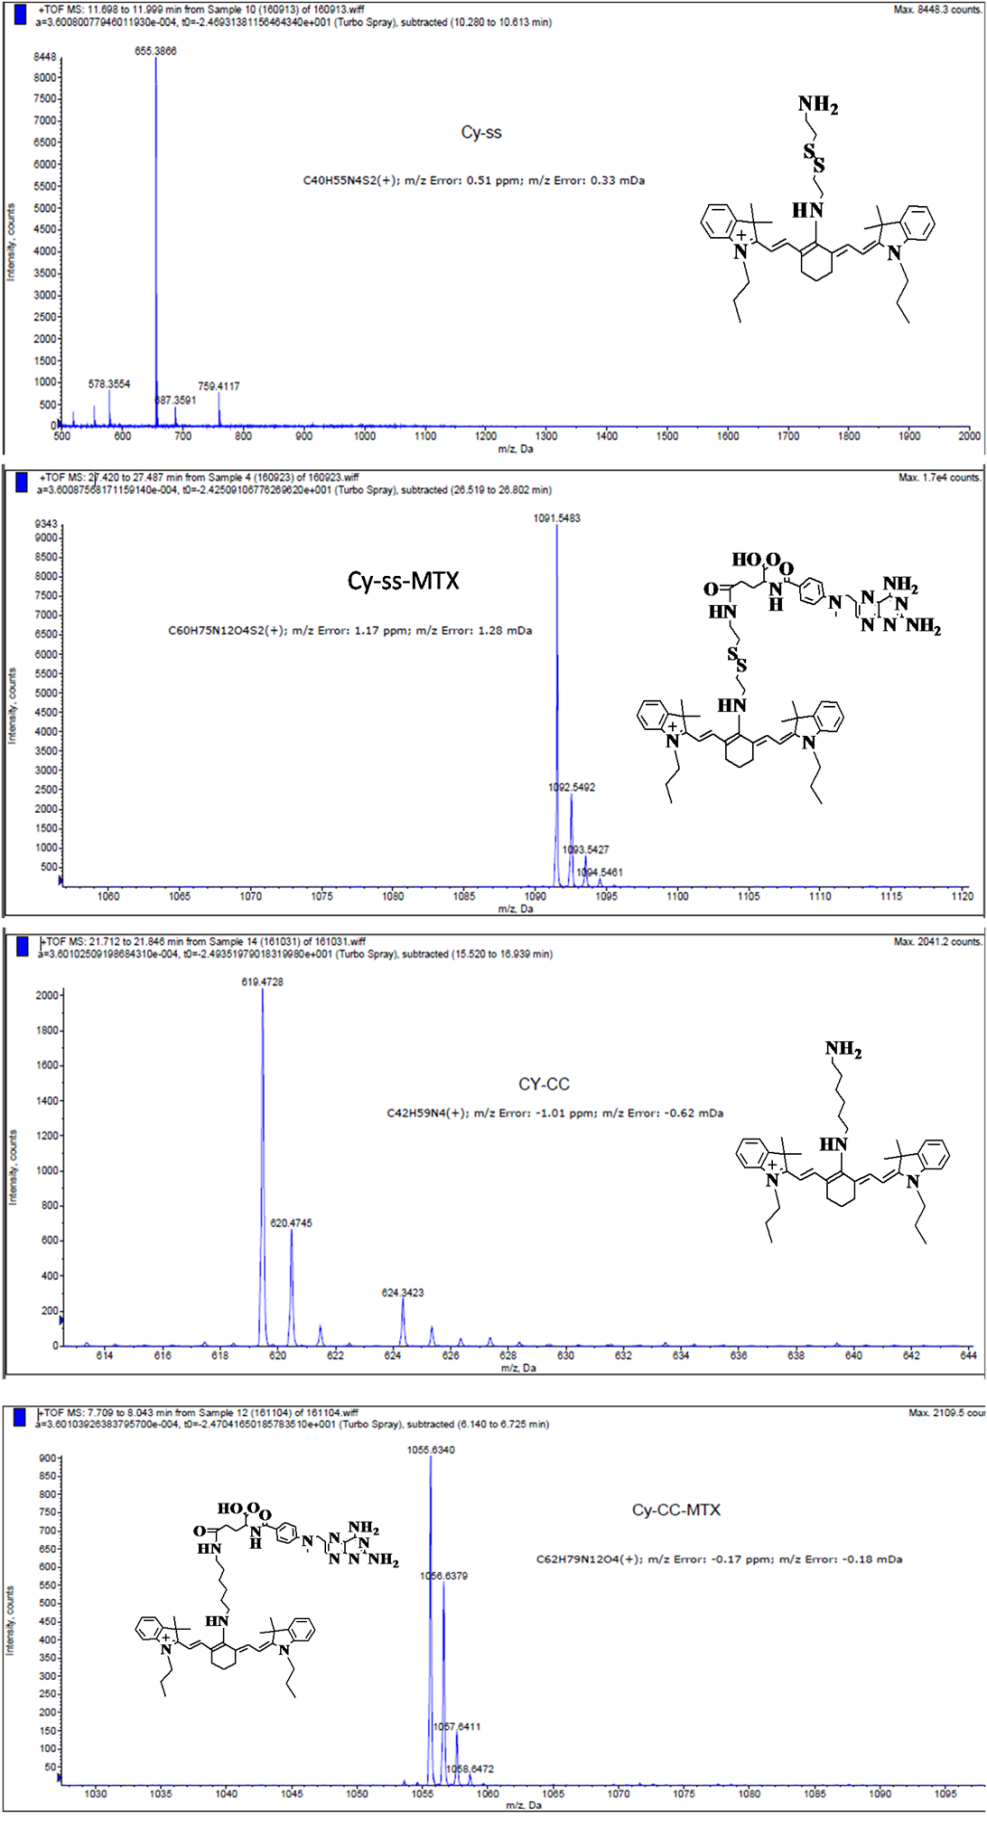


**Supplementary Figure 11:** 1H NMR and 13C NHR (Bruker 400 MHz) of below materials


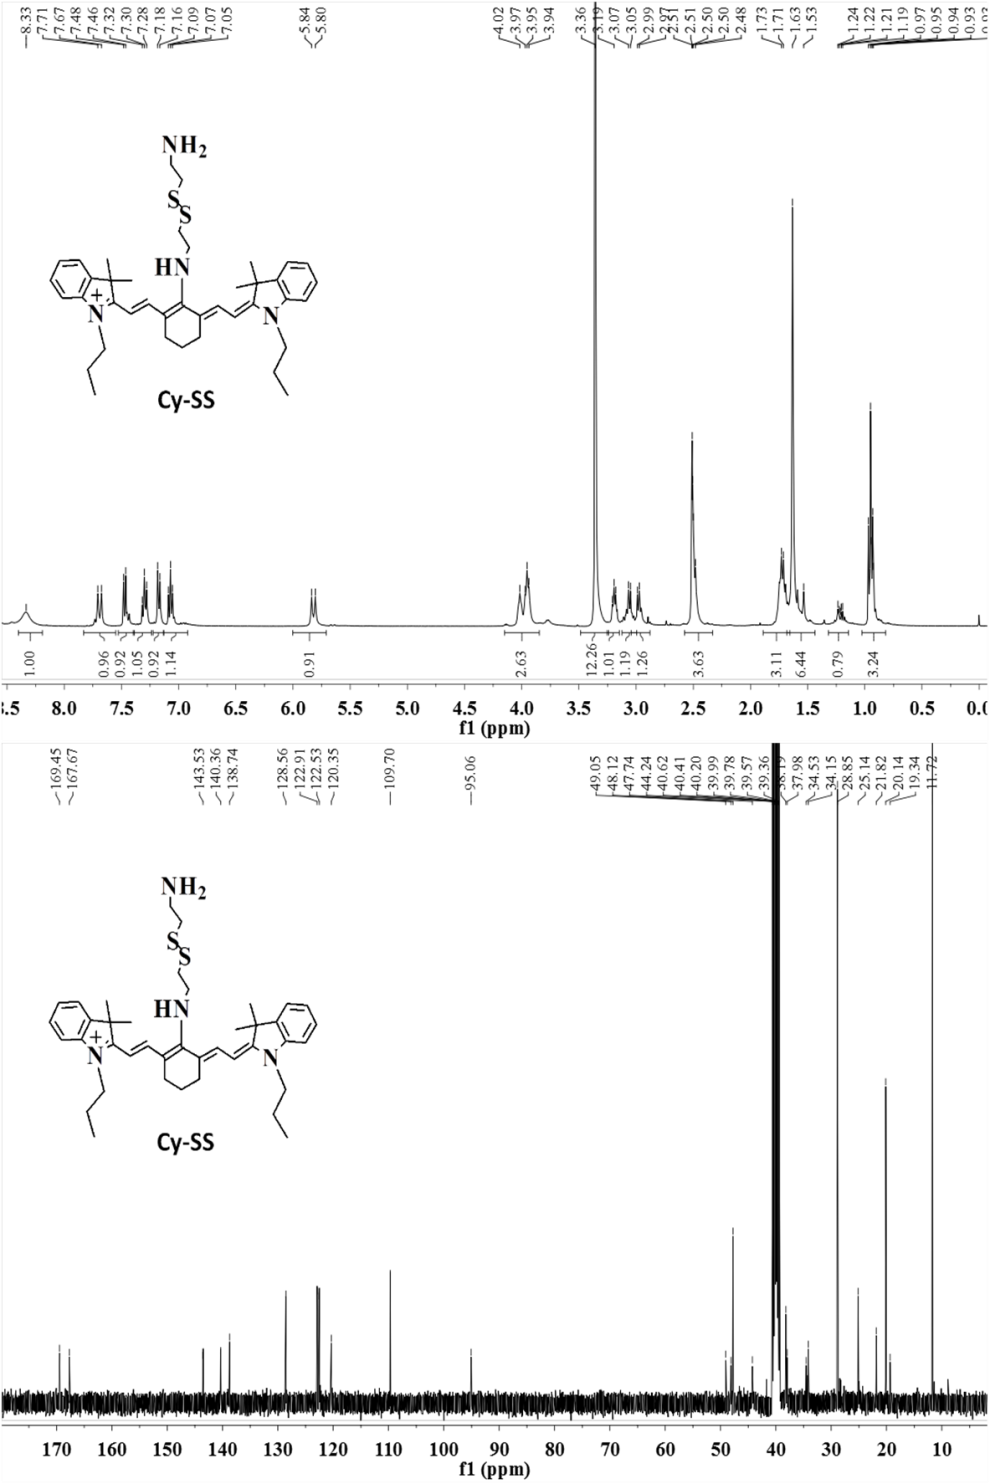


1H NMR (400 MHz, HDMSO): δ 8.33 (s, 1H), 7.70 (t, J = 11.4 Hz, 1H), 7.46 (dd, J = 12.0, 7.5 Hz, 1H), 7.30 (t, J = 7.7 Hz, 1H), 7.17 (d, J = 7.9 Hz, 1H), 7.07 (t, J = 7.3 Hz, 1H), 5.82 (d, J = 13.0 Hz, 1H), 3.97 (dd, J = 19.2, 12.5 Hz, 2H), 3.36 (s, 11H), 3.19 (dd, J = 10.8, 5.2 Hz, 1H), 3.13 – 3.01 (m, 1H), 3.04 – 2.90 (m, 1H), 2.58 – 2.38 (m, 3H), 1.72 (d, J = 7.1 Hz, 3H), 1.58 (d, J = 39.1 Hz, 6H), 1.24 (s, 1H), 1.20 (d, J = 4.8 Hz, 1H), 1.04 – 0.84 (m, 3H).

13C NMR(101 MHz, DMSO): δ 169.45, 167.67, 143.53, 140.36, 138.74, 128.56, 122.91, 122.53, 120.35, 109.70, 95.06, 49.05, 48.12, 47.74, 44.24, 40.62, 40.41, 40.20, 39.99, 39.78, 39.57, 39.36, 38.19, 37.98, 34.53, 34.15, 28.85, 25.14, 21.82, 20.14, 19.34, 11.72.


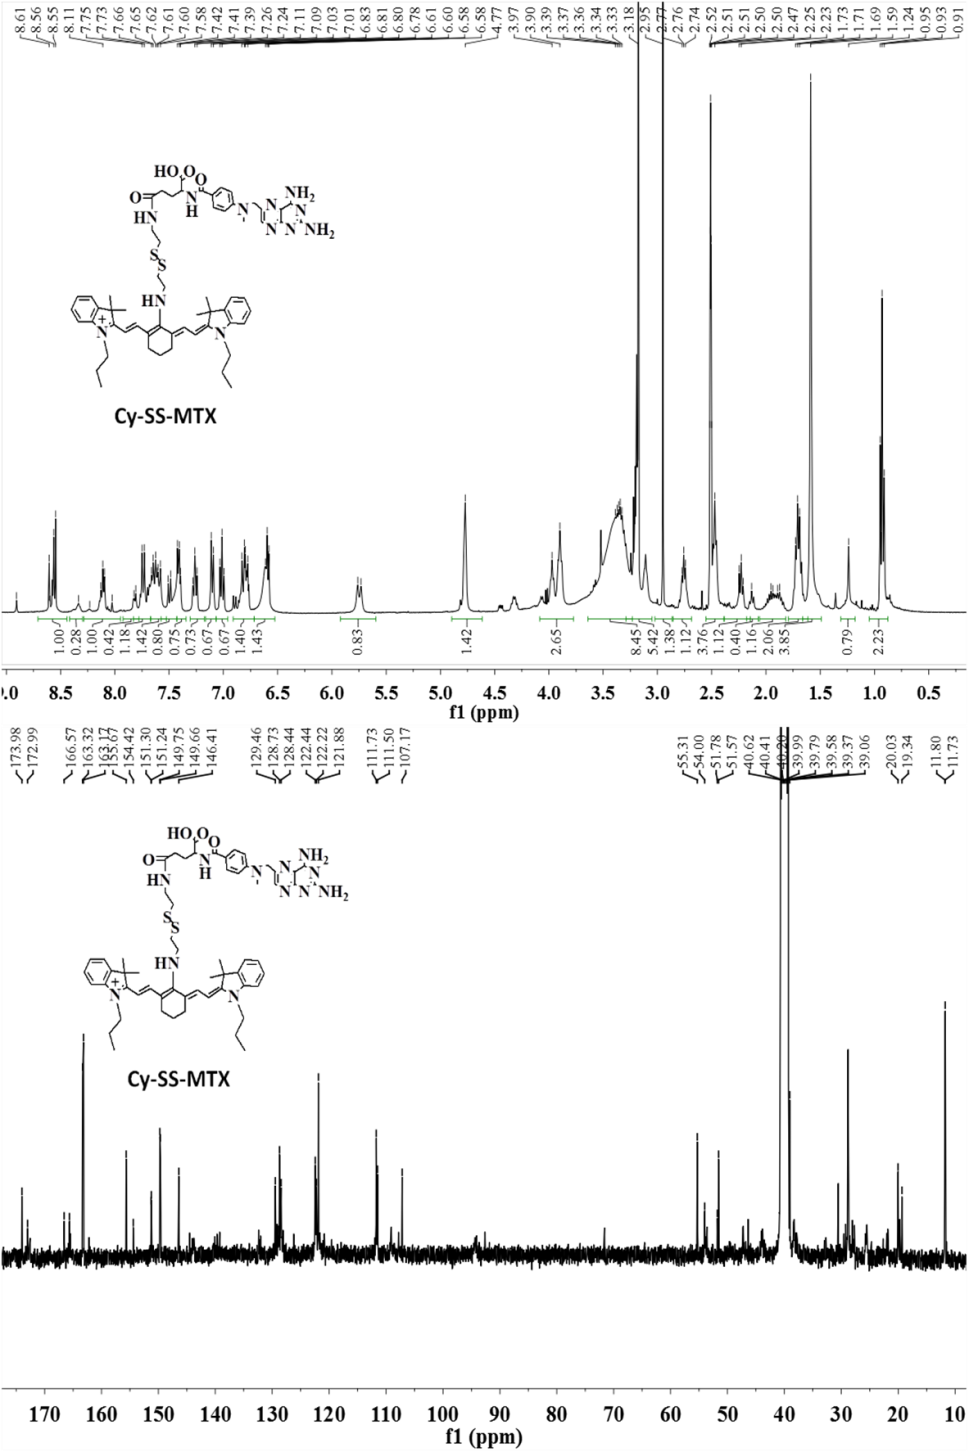


1H NMR (400 MHz, DMSO): δ 8.55 (d, *J* = 6.5 Hz, 1H), 8.33 (s, 1H), 8.10 (d, *J* = 6.3 Hz, 1H), 7.82 (d, *J* = 6.5 Hz, 1H), 7.74 (d, *J* = 8.8 Hz, 1H), 7.67 – 7.52 (m, 1H), 7.57 – 7.43 (m, 1H), 7.41 (d, *J* = 7.1 Hz, 1H), 7.26 (t, *J* = 7.6 Hz, 1H), 7.10 (d, *J* = 7.9 Hz, 1H), 7.01 (t, *J* = 7.4 Hz, 1H), 6.91 – 6.72 (m, 1H), 6.59 (dd, *J* = 8.9, 3.9 Hz, 1H), 5.75 (d, *J* = 12.2 Hz, 1H), 4.77 (s, 1H), 3.93 (d, *J* = 29.0 Hz, 3H), 3.36 (d, *J* = 5.7 Hz, 8H), 3.29 – 3.05 (m, 5H), 2.95 (s, 1H), 2.86 – 2.69 (m, 1H), 2.55 – 2.39 (m, 4H), 2.39 – 2.14 (m, 1H), 2.13 (t, *J* = 7.6 Hz, 1H), 2.06 – 1.82 (m, 1H), 1.70 (dd, *J* = 14.3, 7.1 Hz, 2H), 1.59 (s, 4H), 1.24 (s, 1H), 0.93 (t, *J* = 7.1 Hz, 2H).

13C NMR(101 MHz, DMSO): δ 173.98, 172.99, 166.57, 165.62, 163.32, 163.17, 155.67, 154.42, 151.30, 151.24, 149.75, 149.66, 146.41, 144.51, 139.23, 132.37, 129.46, 128.73, 128.44, 122.44, 122.22, 121.88, 111.73, 111.50, 109.08, 107.17, 92.62, 71.62, 55.31, 54.00, 51.78, 51.57, 47.22, 46.36, 43.83, 40.62, 40.41, 40.20, 39.99, 39.79, 39.58, 39.37, 39.06, 38.27, 30.53, 29.24, 28.81, 28.72, 28.04, 25.51, 21.84, 20.03, 19.72, 19.34, 11.80, 11.73.


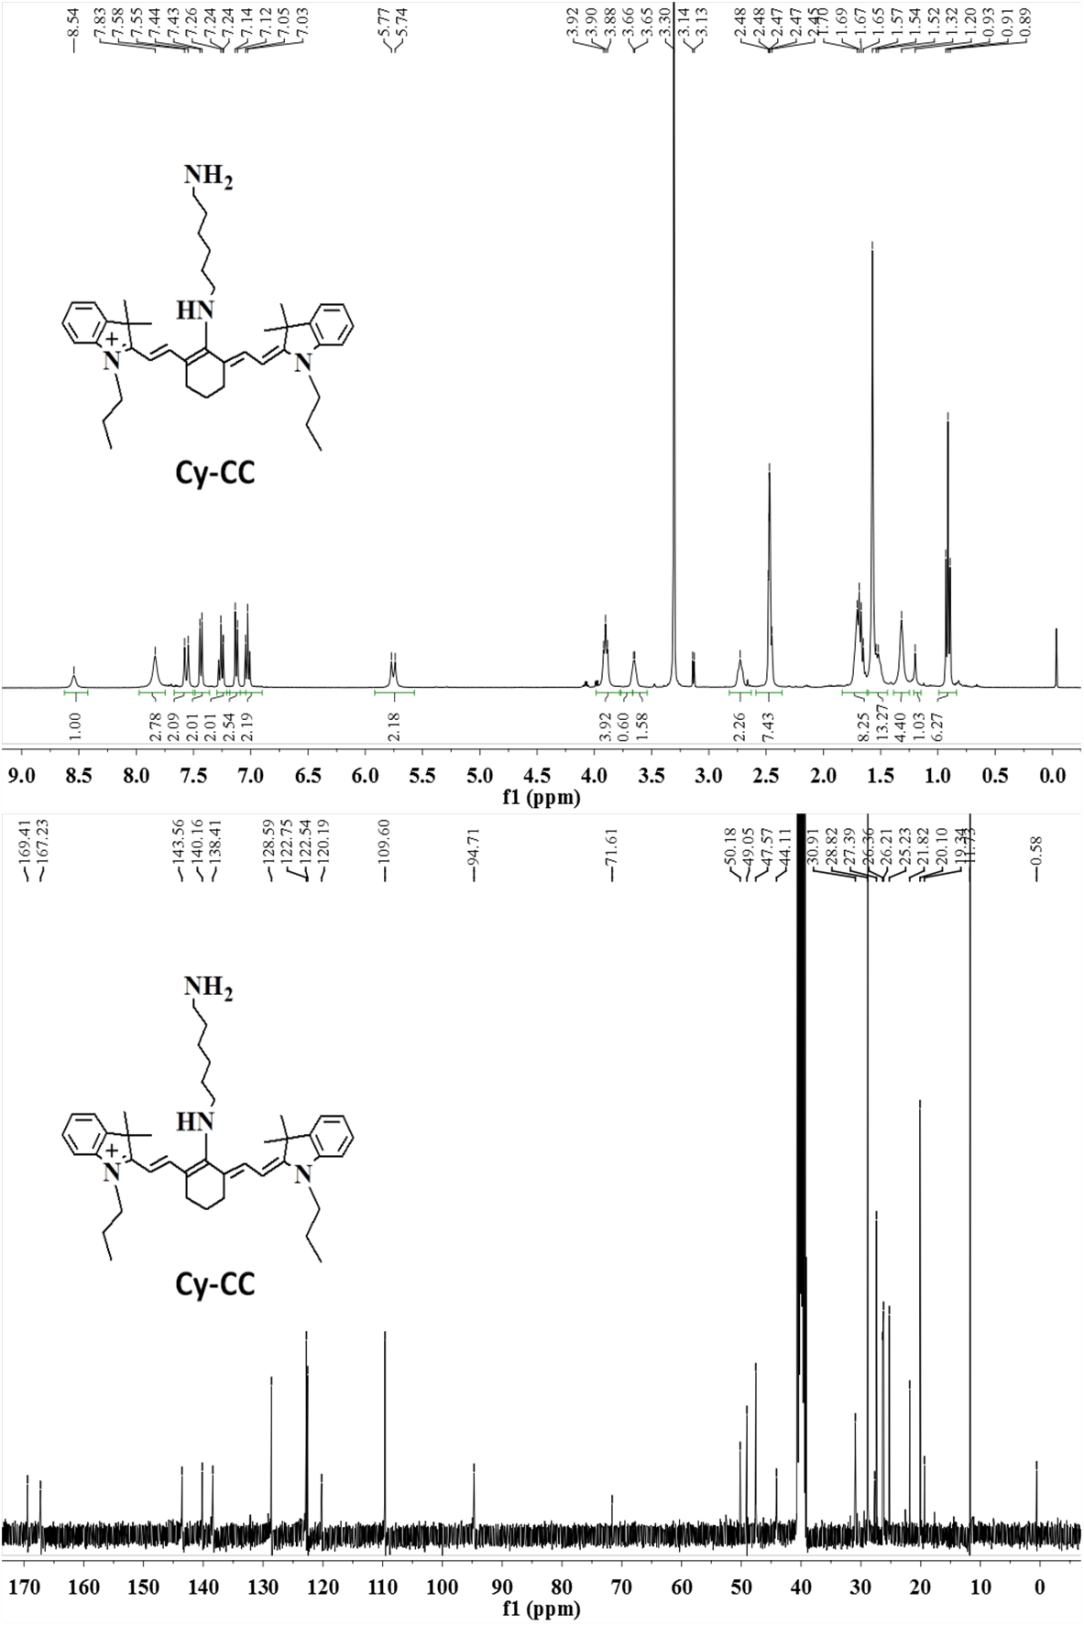


1H NMR (400 MHz, HDMSO): δ 8.54 (s, 1H), 7.83 (s, 3H), 7.56 (d, J = 12.9 Hz, 2H), 7.43 (d, J = 7.2 Hz, 2H), 7.30 – 7.18 (m, 2H), 7.21 – 7.04 (m, 3H), 7.04 (d, J = 7.4 Hz, 2H), 5.76 (d, J = 12.8 Hz, 2H), 3.90 (t, J = 6.8 Hz, 4H), 3.67 (s, 1H), 3.65 (d, J = 3.9 Hz, 2H), 2.73 (s, 2H), 2.47 (dt, J = 8.8, 4.4 Hz, 7H), 1.68 (dd, J = 14.2, 7.1 Hz, 8H), 1.66 – 1.44 (m, 15H), 1.32 (s, 5H), 1.20 (s, 1H), 0.91 (t, J = 7.4 Hz, 6H).

13C NMR(101 MHz, DMSO): δ 169.41, 167.23, 143.56, 140.16, 138.41, 128.59, 122.75, 122.54, 120.19, 109.60, 94.71, 71.61, 50.18, 49.05, 47.57, 44.11, 30.91, 28.82, 27.67, 27.39, 26.36, 26.21, 25.23, 21.82, 20.10, 19.34, 11.73.


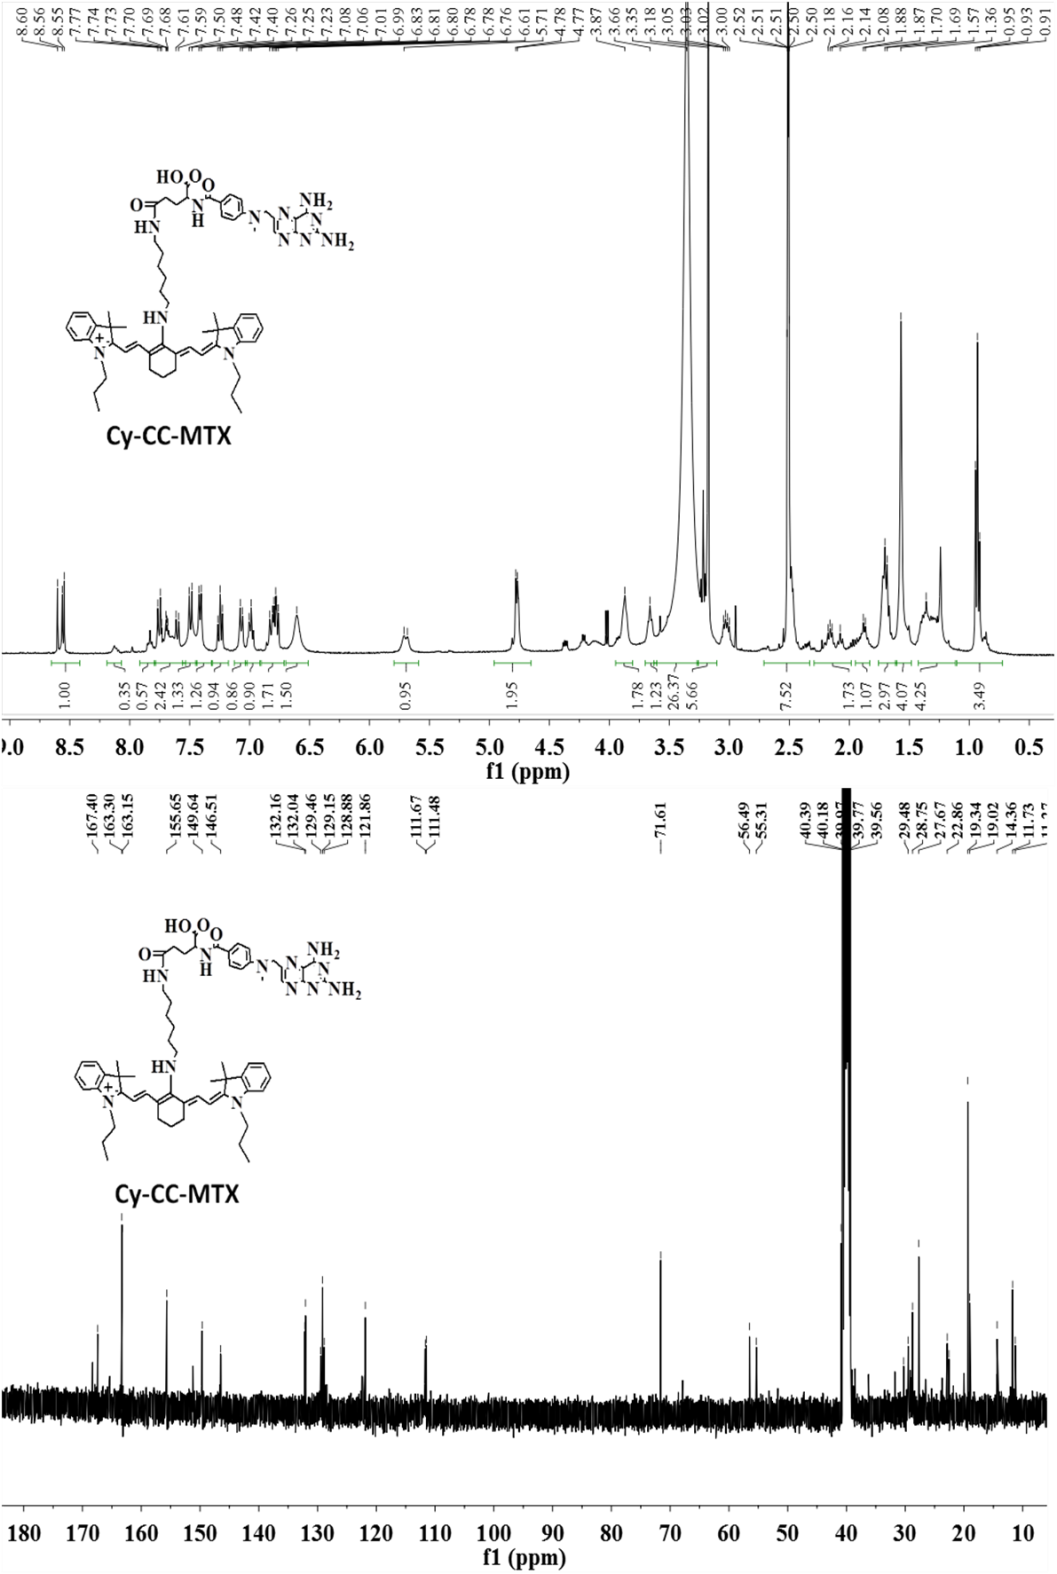


1H NMR (400 MHz, DMSO) δ 8.65 – 8.42 (m, 1H), 8.13 (s, 1H), 7.83 (s, 1H), 7.69 (ddd, *J* = 39.3, 24.7, 8.9 Hz, 2H), 7.49 (d, *J* = 8.9 Hz, 1H), 7.41 (d, *J* = 7.3 Hz, 1H), 7.25 (t, *J* = 7.6 Hz, 1H), 7.07 (d, *J* = 7.7 Hz, 1H), 7.00 (d, *J* = 7.4 Hz, 1H), 6.90 – 6.71 (m, 2H), 6.61 (s, 2H), 5.70 (d, *J* = 11.4 Hz, 1H), 4.77 (d, *J* = 5.7 Hz, 2H), 3.87 (s, 2H), 3.66 (s, 1H), 3.35 (s, 26H), 3.18 (s, 6H), 2.51 (dt, *J* = 3.5, 1.7 Hz, 8H), 2.14 (dd, *J* = 23.9, 17.0 Hz, 2H), 1.87 (d, *J* = 6.7 Hz, 1H), 1.69 (d, *J* = 7.1 Hz, 3H), 1.57 (s, 4H), 1.36 (s, 4H), 0.93 (t, *J* = 6.8 Hz, 3H).

13C NMR (101 MHz, DMSO) δ 167.40, 163.30, 163.15, 155.65, 149.64, 146.51, 132.16, 132.04, 129.46, 129.15, 128.88, 121.86, 111.67, 111.48, 71.61, 56.49, 55.31, 40.89, 40.60, 40.39, 40.18, 39.97, 39.77, 39.56, 39.35, 30.26, 29.48, 28.75, 27.67, 22.86, 22.55, 19.34, 19.02, 14.36, 11.73, 11.27.
